# Supplementary material
Source: PubMed Central journal article supplement (PMC6408137)
Supplement: NIHMS1006359-supplement-1.pdf [file NIHMS1006359-supplement-1.pdf]

## Supplementary Materials for

### The probacterial effect of type I interferon signaling requires its own negative regulator USP18

Namir Shaabani\*, Nadine Honke, Nhan Nguyen, Zhe Huang, Kei-ichiro Arimoto, Daniel Lazar, Taylor K. Loe, Karl S. Lang, Marco Prinz, Klaus-Peter Knobloch, Dong-Er Zhang, John R. Teijaro\*

\*Corresponding author. Email: shaabani@scripps.edu (N.S.); teijaro@scripps.edu (J.R.T.)

Published 28 September 2018, *Sci. Immunol.* **3**, eaau2125 (2018)  
DOI: 10.1126/sciimmunol.aau2125

#### The PDF file includes:

- Fig. S1. ISG levels in DCs and MΦ after *L.m.* infection.
- Fig. S2. The role of IFNAR on MΦ during *L.m.* infection.
- Fig. S3. *Usp18* expression after *L.m.* infection.
- Fig. S4. ISG levels in WT and *Usp18*<sup>-/-</sup> after *L.m.* infection.
- Fig. S5. The role of USP18 in DCs after low dose (400 CFU) of *L.m.*
- Fig. S6. DC numbers in *Usp18*<sup>fl/fl</sup> CD11c-Cre mice after *L.m.* infection.
- Fig. S7. Bacterial titers in sorted macrophages and DCs after *L.m.* infection.
- Fig. S8. The role of USP18 in the uptake and early replication of *L.m.*
- Fig. S9. The role of USP18 in inhibiting TNF-α signaling.
- Fig. S10. USP18 inhibits ROS production.
- Fig. S11. USP18 inhibits antibacterial effect of TNF-α but not IFN-γ.
- Fig. S12. ISG levels in sorted DCs after LCMV infection.
- Table S1. Mutation sites of murine and human USP18 and the consequences on the functional domains.

#### Other Supplementary Material for this manuscript includes the following:

(available at [immunology.sciencemag.org/cgi/content/full/3/27/eaau2125/DC1](http://immunology.sciencemag.org/cgi/content/full/3/27/eaau2125/DC1))

Table S2. Raw data (Excel file).

## Figure S1

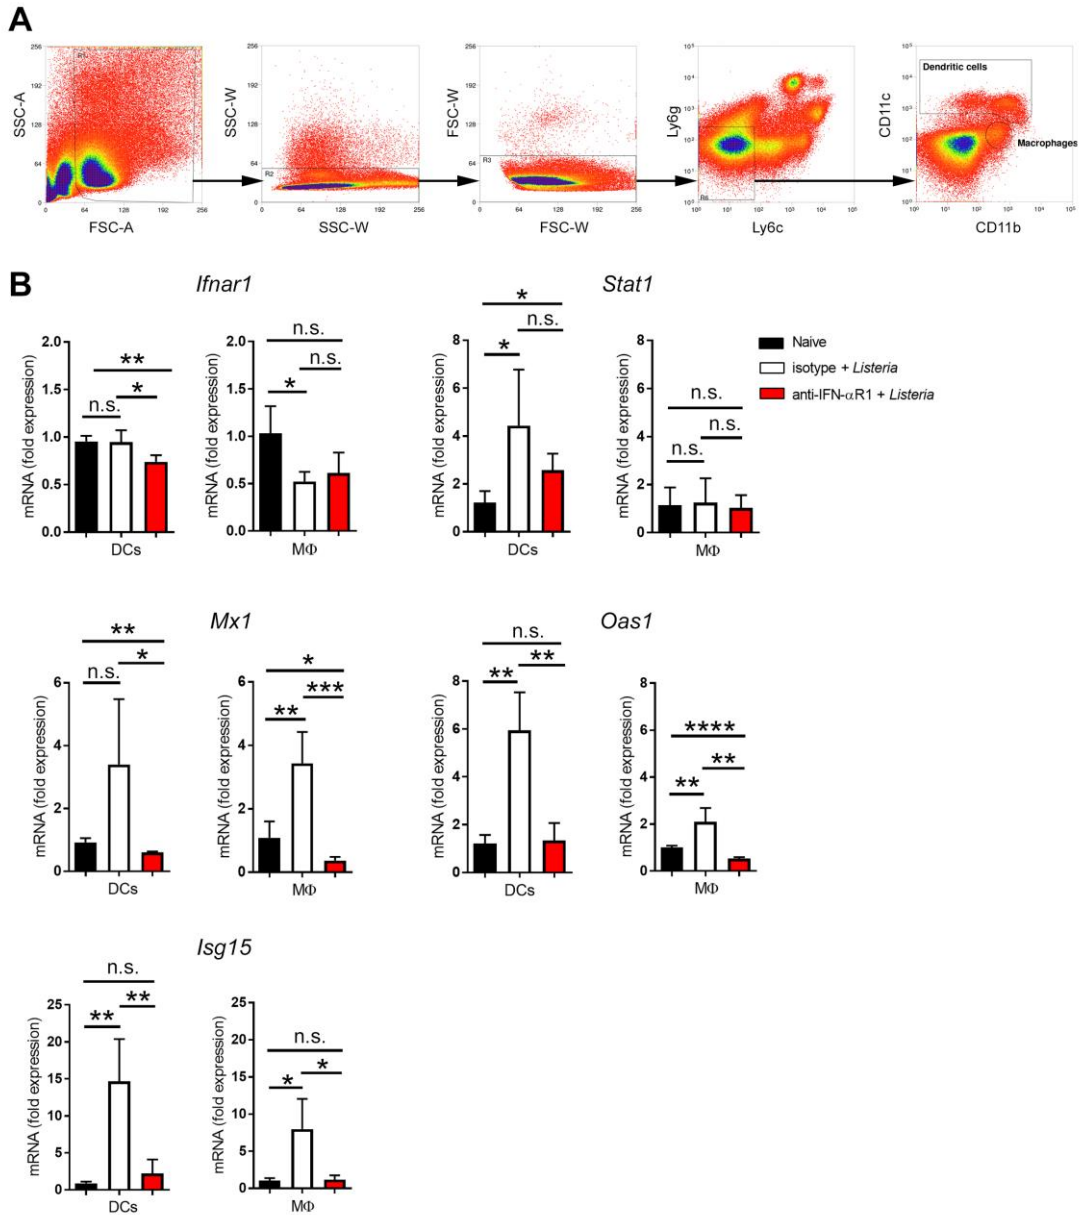

**Fig. S1. ISG levels in DCs and M $\Phi$  after *L.m.* infection.**

C57BL/6 wild-type mice were treated with 1 mg of anti-IFN- $\alpha$ R1 or isotype control antibody. Next day, mice were infected with 4000 CFU *Listeria monocytogenes* (*L.m.*) for 24 hours. DCs and macrophages were sorted by FACS (A) and indicated genes were measured by qRT-PCR (B) (n = 4). Statistical significance was determined by Student's t-test (B). n.s., not significant; \*P < 0.05; \*\*P < 0.01; \*\*\*P < 0.001 and \*\*\*\*P < 0.0001. Data are representative of at least two independent experiments.

## Figure S2

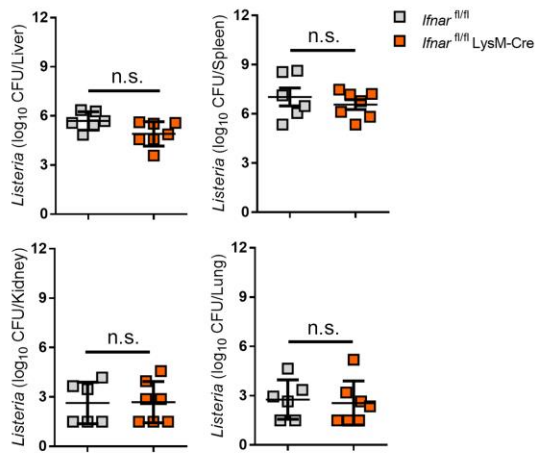

### Fig. S2. The role of IFNAR on MΦ during *L.m.* infection.

*Ifnar<sup>fl/fl</sup>* LysM-Cre mice and littermate controls were infected with 4000 CFU *Listeria monocytogenes* (*L.m.*). After 4 days, bacterial titers were measured in the indicated organs (n = 6-7). Statistical significance was determined by Student's t-test. n.s., not significant. Data are pooled from two independent experiments.

## Figure S3

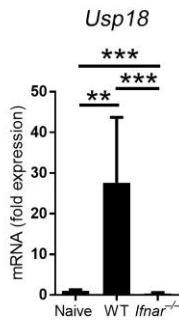

### Fig. S3. *Usp18* expression after *L.m.* infection.

C57BL/6 wild-type and *Ifnar<sup>-/-</sup>* mice were infected with 4000 CFU. After 24 hours, *Usp18* expression was measured in splenocytes by qRT-PCR (n = 6-7). Statistical significance was determined by Student's t-test. \*\*P < 0.01. and \*\*\*P < 0.001. Data are pooled from two independent experiments.

## Figure S4

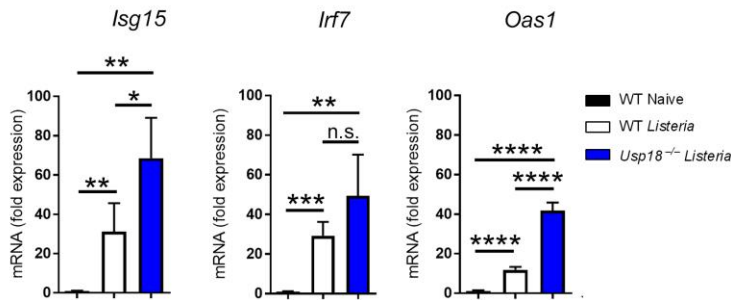

**Fig. S4. ISG levels in WT and *Usp18*<sup>-/-</sup> after *L.m.* infection.**

WT or *Usp18*<sup>-/-</sup> mice were infected with 4000 CFU *L.m.* After 24 hours, indicated genes were measured by qRT-PCR in the spleen (n = 3-4). Statistical significance was set at the level of P < 0.05 and was determined by Student's t-test. n.s., not significant; \*P < 0.05; \*\*P < 0.01; \*\*\*P < 0.001 and \*\*\*\*P < 0.0001.

## Figure S5

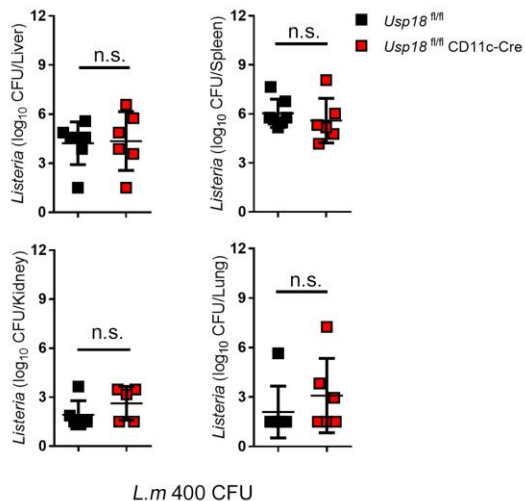

**Fig. S5. The role of USP18 in DCs after low dose (400 CFU) of *L.m.***

*Usp18*<sup>fl/fl</sup> CD11c-Cre mice and littermate controls were infected with 400 CFU *L.m.* After 4 days, bacterial titers were measured in the indicated organs (n = 6-7). Statistical significance was determined by Student's t-test. n.s., not significant. Data are pooled from two independent experiments.

## Figure S6

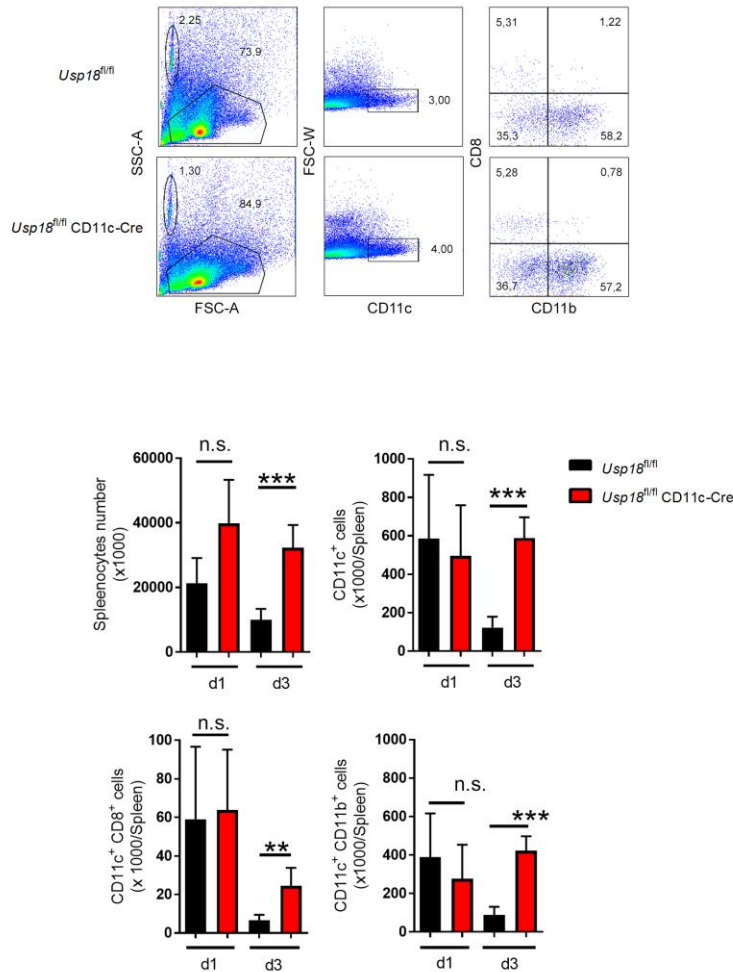

**Fig. S6. DC numbers in *Usp18<sup>fl/fl</sup>* CD11c-Cre mice after *L.m.* infection.**

*Usp18<sup>fl/fl</sup>* CD11c-Cre mice and littermate controls were infected with 4000 CFU *L.m.* Number of spleenocytes and dendritic cells were measured in spleens by FACS on indicated days (n = 4-6). Statistical significance was determined by Student's t-test. n.s., not significant; \*\*P < 0.01. and \*\*\*P < 0.001. Data are representative of at least two independent experiments.

## Figure S7

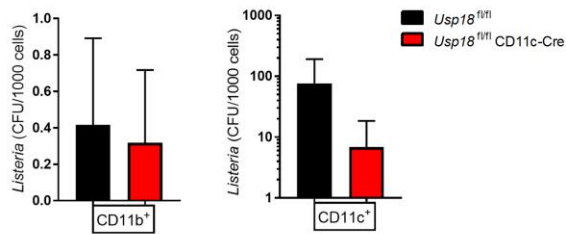

**Fig. S7. Bacterial titers in sorted macrophages and DCs after *L.m.* infection.** *Usp18*<sup>fl/fl</sup> CD11c-Cre mice and littermate controls were infected with 7000 CFU *Listeria monocytogenes* (*L.m.*). After 2 days, splenic CD11b<sup>+</sup> and CD11c<sup>+</sup> cells were sorted by FACS, lysed and bacterial titers were measured (n = 4).

## Figure S8

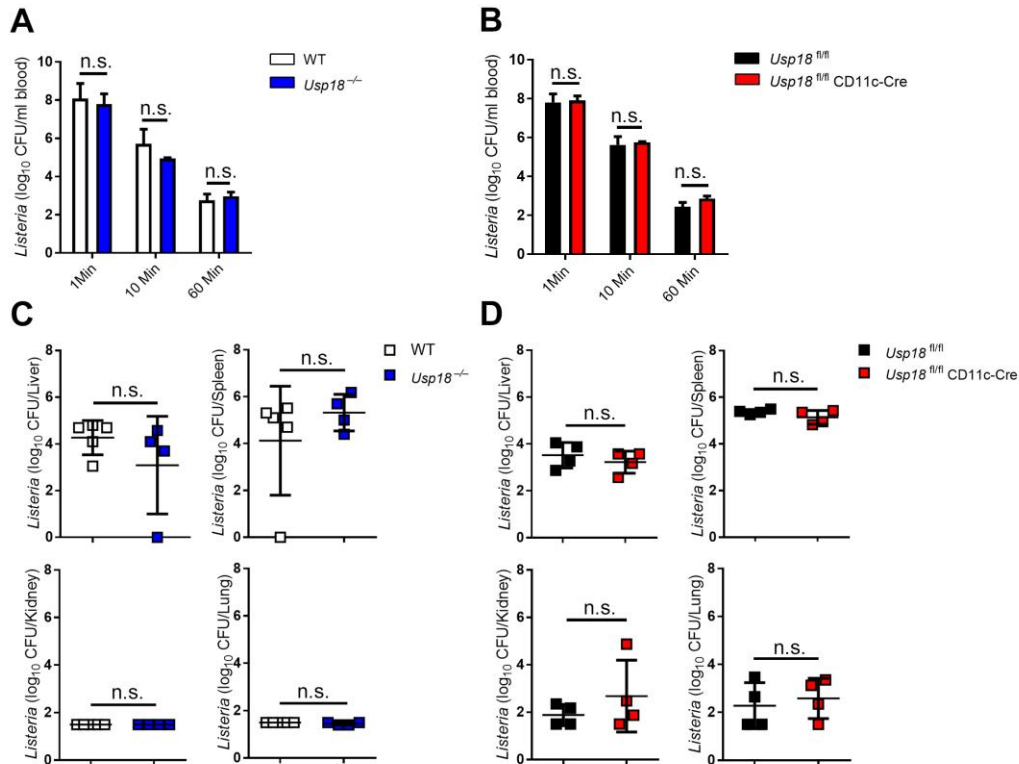

### Fig. S8. The role of USP18 in the uptake and early replication of *L.m.*

(A) WT or *Usp18*<sup>-/-</sup> mice were infected with 1 x 10<sup>9</sup> CFU *Listeria monocytogenes* (*L.m.*). Bacterial titers were measured in blood at the indicated time points (n = 3). Data are representative of at least two independent experiments. (B) *Usp18*<sup>fl/fl</sup> CD11c-Cre mice and littermate controls were infected with 1 x 10<sup>9</sup> CFU *L.m.*. Bacterial titers were measured in blood at indicated time points (n = 3). Data are representative of at least two independent experiments. (C-D) WT and *Usp18*<sup>-/-</sup> mice (C) or *Usp18*<sup>fl/fl</sup> CD11c-Cre mice and littermate controls (D) were infected with 4000 CFU *L.m.*. After 24 hours, bacterial titers were measured in indicated organs (n = 4). Data are representative of at least two independent experiments. Statistical significance was determined by Student's t-test (A-D). n.s., not significant.

## Figure S9

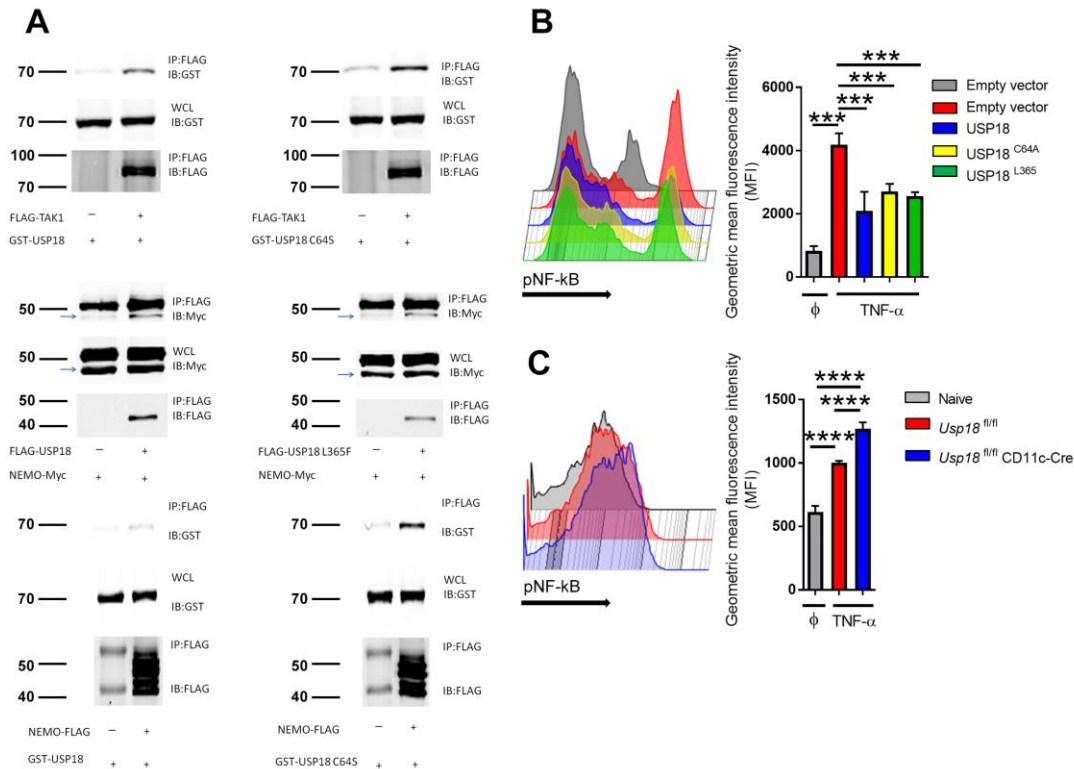

### Fig. S9. The role of USP18 in inhibiting TNF- $\alpha$ signaling.

(A) Immunoblot (IB) analysis of whole cell lysates (WCL) or immunoprecipitates (IP) derived from 293T cells 24 hours after co-transfection with plasmids encoding GST-USP18, and NEMO-FLAG, or FLAG-TAK1. Data are representative of at least two independent experiments. (B) HeLa cells were transfected with empty vector, USP18, USP18<sup>C64A</sup> or USP18<sup>L365F</sup> plasmid. Cells were treated with 100 ng of recombinant human TNF- $\alpha$  for 20 minutes. P-NF- $\kappa$ b p65 was measured by FACS (n = 6). Data are representative of at least two independent experiments. (C) Bone marrow-derived dendritic cells from *Usp18*<sup>fl/fl</sup> CD11c-Cre mice and littermate controls were treated with 25 ng of recombinant mouse TNF- $\alpha$  for 15 minutes or left untreated. P-NF- $\kappa$ b p65 was measured by FACS (n = 4). Data are representative of at least two independent experiments. Statistical significance was determined by Student's t-test (B-C). \*\*\*P < 0.001 and \*\*\*\*P < 0.0001.



## Figure S10

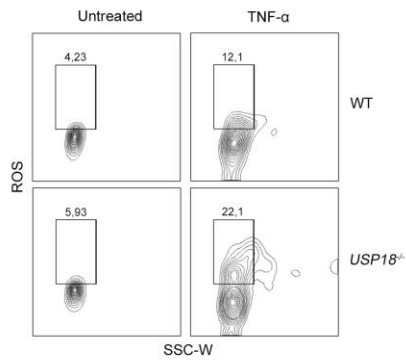

**Fig. S10. USP18 inhibits ROS production.**

*Usp18*<sup>-/-</sup> and control mice were treated with 50ng TNF- $\alpha$  for 30 minutes or left untreated. Reactive oxygen species (ROS) was measured in DCs (n = 7-9).

## Figure S11

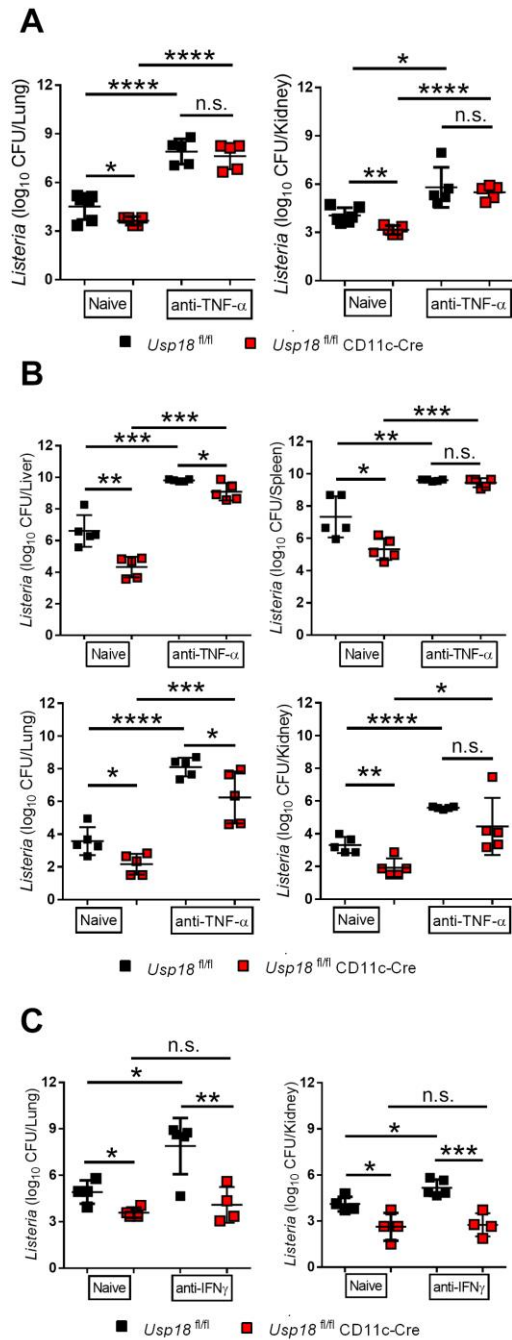

**Fig. S11. USP18 inhibits antibacterial effect of TNF- $\alpha$  but not IFN- $\gamma$ .**

(A-B) *Usp18<sup>fl/fl</sup>* CD11c-Cre mice and littermate controls were treated intraperitoneally with 500  $\mu$ g (A) or 50  $\mu$ g (B) of anti-TNF- $\alpha$  antibody on day -1, 1 and 2 or left untreated. Next day, mice were infected with 4000 CFU *L.m.*. After 4 days, titers of bacteria were measured in the indicated organs ( $n = 5$ ). Data are representative of at least two independent experiments. (C) *Usp18<sup>fl/fl</sup>* CD11c-Cre mice and littermate controls were treated with 250  $\mu$ g of anti-IFN- $\gamma$  antibody on day -1, 1 and 2 or left untreated. Next day, mice were infected with 4000 CFU *L.m.* After 4 days, titers of bacteria were measured in the indicated organs ( $n = 4-5$ ). Data are representative of at least two independent experiments. Statistical significance was determined by Student's t-test (A-C) n.s., not significant; \* $P < 0.05$ ; \*\* $P < 0.01$ ; \*\*\* $P < 0.001$  and \*\*\*\* $P < 0.0001$ .

## Figure S12

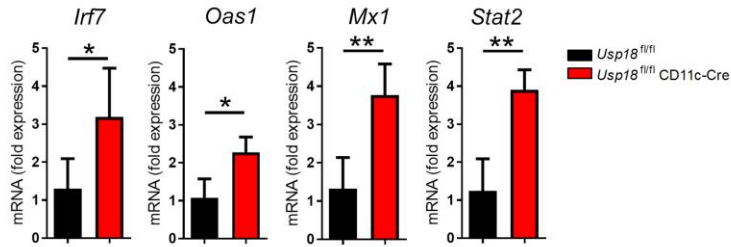

**Fig. S12. ISG levels in sorted DCs after LCMV infection.**

*Usp18<sup>fl/fl</sup>* CD11c-Cre mice and littermate controls were infected with  $2 \times 10^6$  PFU LCMV-WE. After 2 days, DCs were sorted by FACS and indicated genes were measured by qRT-PCR. Relative quantities (RQs) were determined with the equation  $RQ = 2^{-\Delta\Delta Ct}$  ( $n = 4$ ). Statistical significance was determined by Student's t-test. \*P < 0.05; \*\*P < 0.01.

**Table S1. Mutation sites of murine and human USP18 and the consequences on the functional domains.**

| <b>Species</b> | <b>Mutation site</b> | <b>Interferon signaling</b> | <b>Isopeptidase activity</b> |
|----------------|----------------------|-----------------------------|------------------------------|
| Human          | C64                  | not affected                | inhibited                    |
| Mouse          | C61                  | not affected                | inhibited                    |
| Human          | L365                 | increased                   | inhibited                    |
| Mouse          | L361                 | increased                   | inhibited                    |
